# Supplementary material for: High thermoelectric performance in metal phosphides MP2 (M = Co, Rh and Ir): a theoretical prediction from first-principles calculations
Source: Royal Society of Chemistry journal article supplement (doi:10.1039/d2ra04175h), 2022-01-01
Supplement: d2ra04175h1.pdf [file d2ra04175h1.pdf]

## Electronic Supplementary Information – High thermoelectric performance in metal phosphides $MP_2$ (M = Co, Rh and Ir): A theoretical prediction from first-principles calculations

Chung-Jin Kang<sup>a</sup>, Un-Gi Jong<sup>a\*</sup>, Yun-Hyok Kye<sup>a</sup> and Chol-Jun Yu<sup>a†</sup>

<sup>a</sup>Chair of Computational Materials Design (CMD), Faculty of Materials Science, Kim Il Sung University,  
Pyongyang, PO Box 76, Democratic People's Republic of Korea

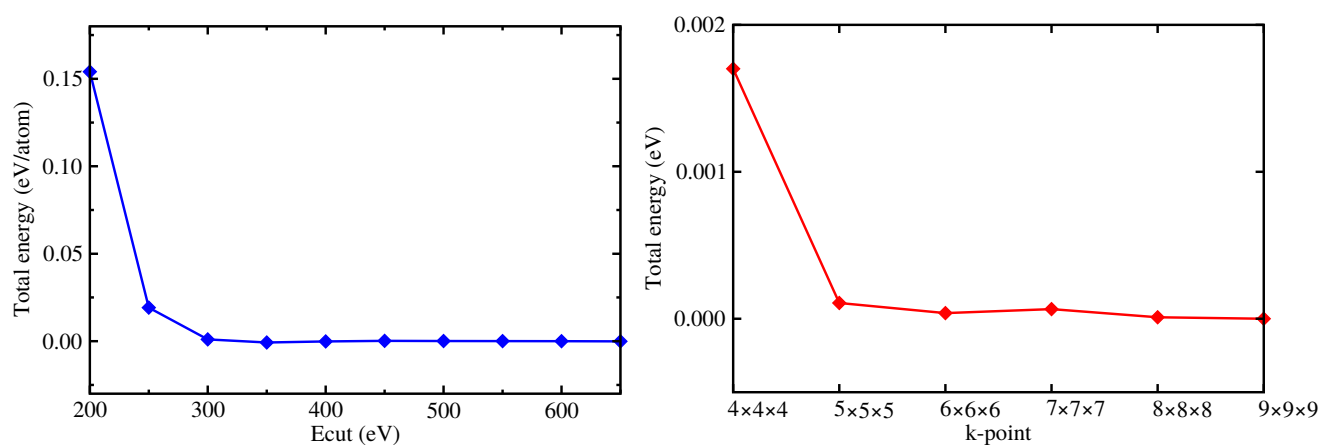

Figure S1. Total energy convergence test as varying the kinetic cutoff energy with a fixed  $k$ -point mesh of (8×8×8) (left panel) and the  $k$ -point mesh with a fixed cutoff energy of 600 eV (right panel) for the  $CoP_2$  unit cell.

\*Un-Gi Jong, Email: ug.jong@ryongnamsan.edu.kp

†Chol-Jun Yu, Email: cj.yu@ryongnamsan.edu.kp

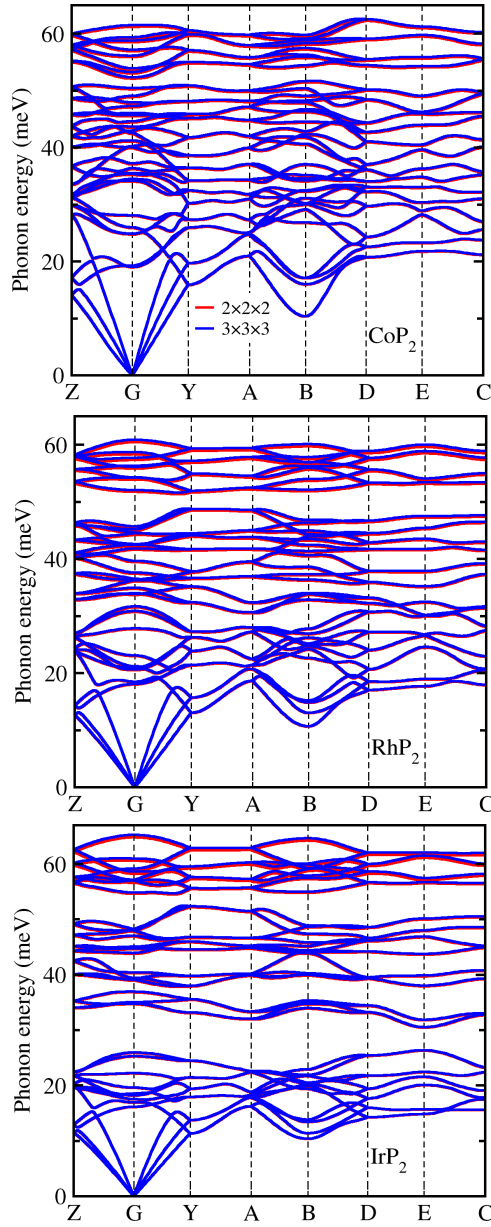

Figure S2. Comparison of the phonon dispersion curves calculated using  $2\times 2\times 2$  (red lines) and  $3\times 3\times 3$  (blue lines) supercells for the monoclinic  $MP_2$  ( $M = \text{Co}, \text{Rh}, \text{and Ir}$ ).

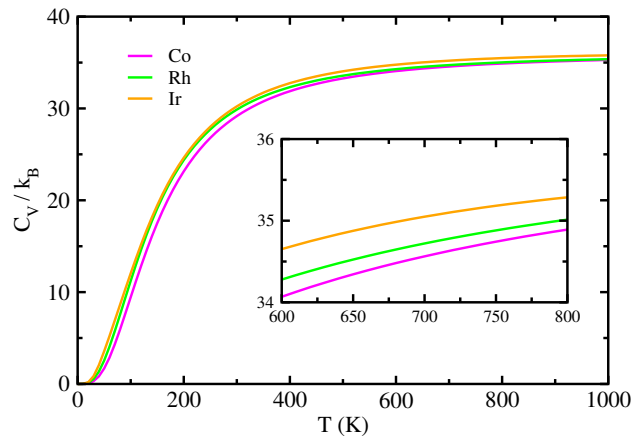

Figure S3. Heat capacity  $C_V$  as a function of temperature in  $MP_2$  ( $M = \text{Co}, \text{Rh}, \text{Ir}$ ).

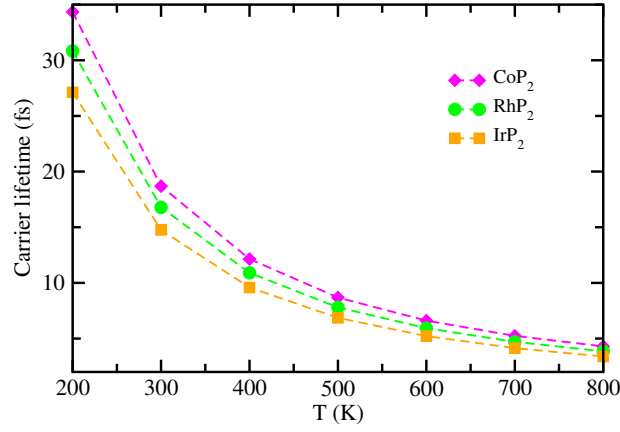

Figure S4. Carrier lifetime calculated as a function of temperature within the deformation potential theory for the  $MP_2$  ( $M = \text{Co}, \text{Rh}, \text{and Ir}$ ).

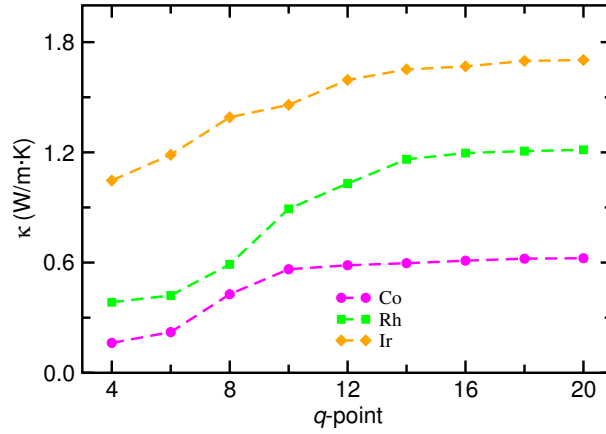

Figure S5. Convergence tests for the lattice thermal conductivity of  $MP_2$  ( $M = \text{Co}, \text{Rh}, \text{and Ir}$ ) according to the size of  $q$ -point mesh in the phonon BZ.

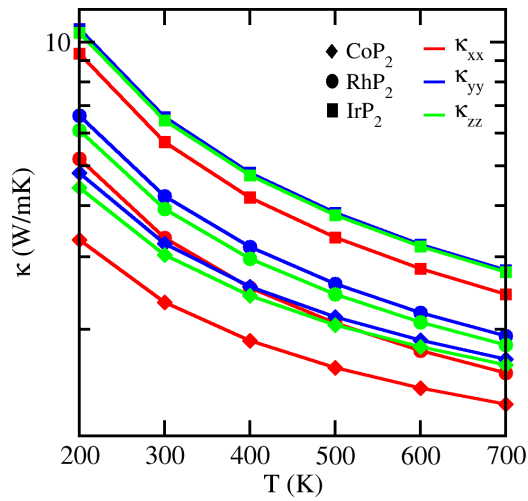

Figure S6. Total lattice thermal conductivity ( $\kappa_l = \kappa_{IP} + \kappa_{IC}$ ) as functions of temperature along the  $x$ ,  $y$ , and  $z$ -axis for the monoclinic  $MP_2$  ( $M = \text{Co}, \text{Rh}, \text{and Ir}$ ).

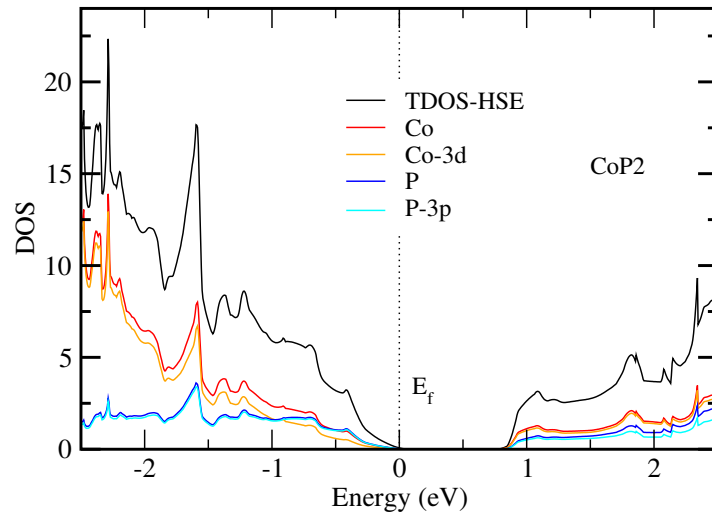

Figure S7. Atom-projected electron density of states calculated by the HSE06 hybrid functional for  $\text{CoP}_2$ .

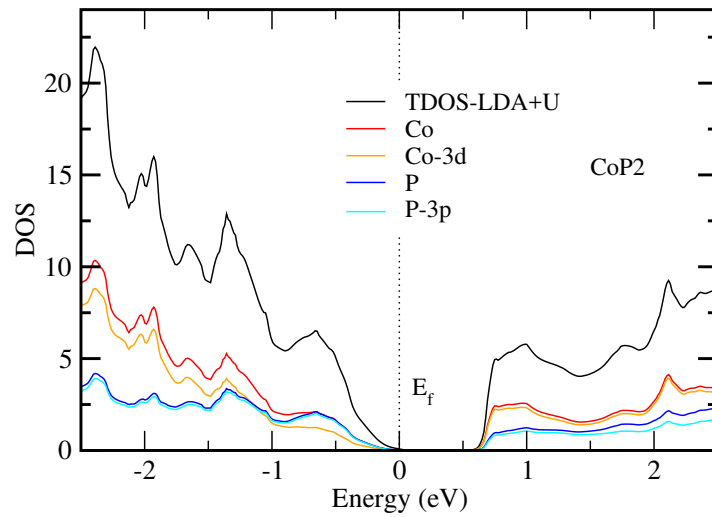

Figure S8. Atom-projected electron density of states calculated by LDA+U approach with  $U = 4$  eV for  $\text{CoP}_2$ .

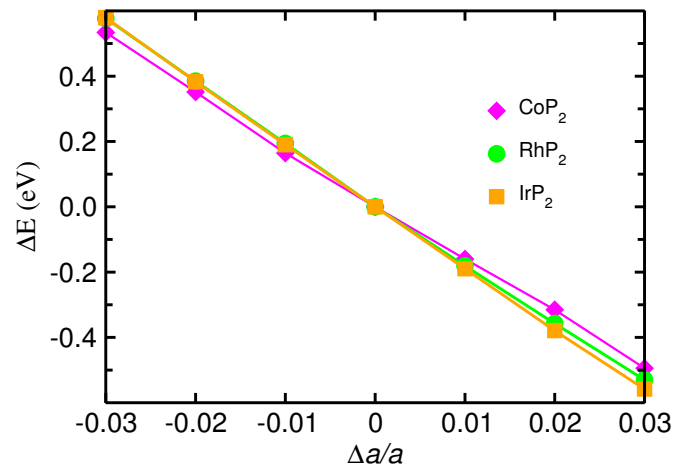

Figure S9. Deformation potential  $D$  calculated with mBJ functional for the  $\text{MP}_2$  ( $M = \text{Co}, \text{Rh}, \text{and Ir}$ ).

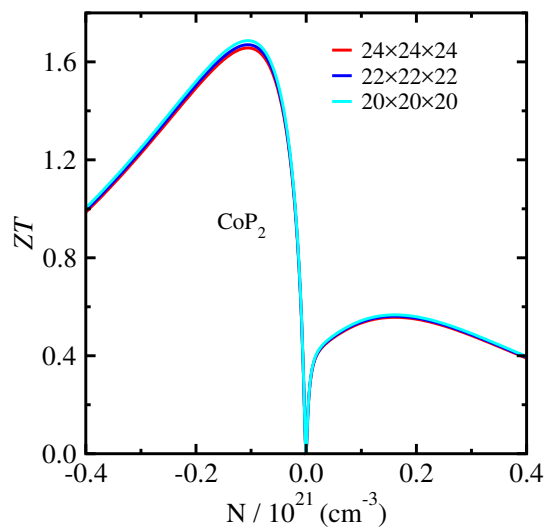

Figure S10. Figure of merit  $ZT$  calculated at 700 K using different  $k$ -point meshes for  $\text{CoP}_2$ .

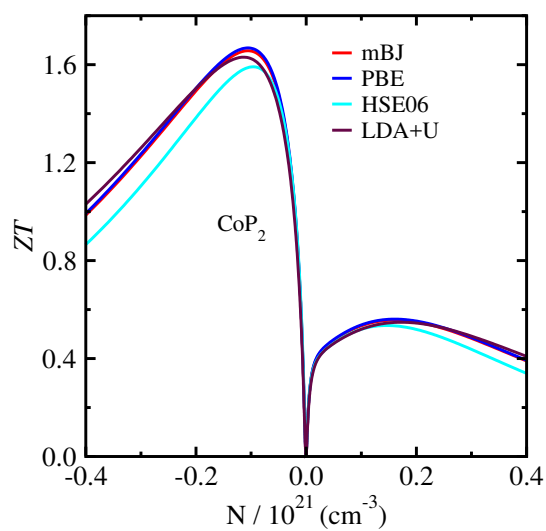

Figure S11. Figure of merit  $ZT$  calculated at 700 K using different exchange-correlation functionals including PBE, mBJ and HSE06, and using LDA+U approach for  $\text{CoP}_2$ .

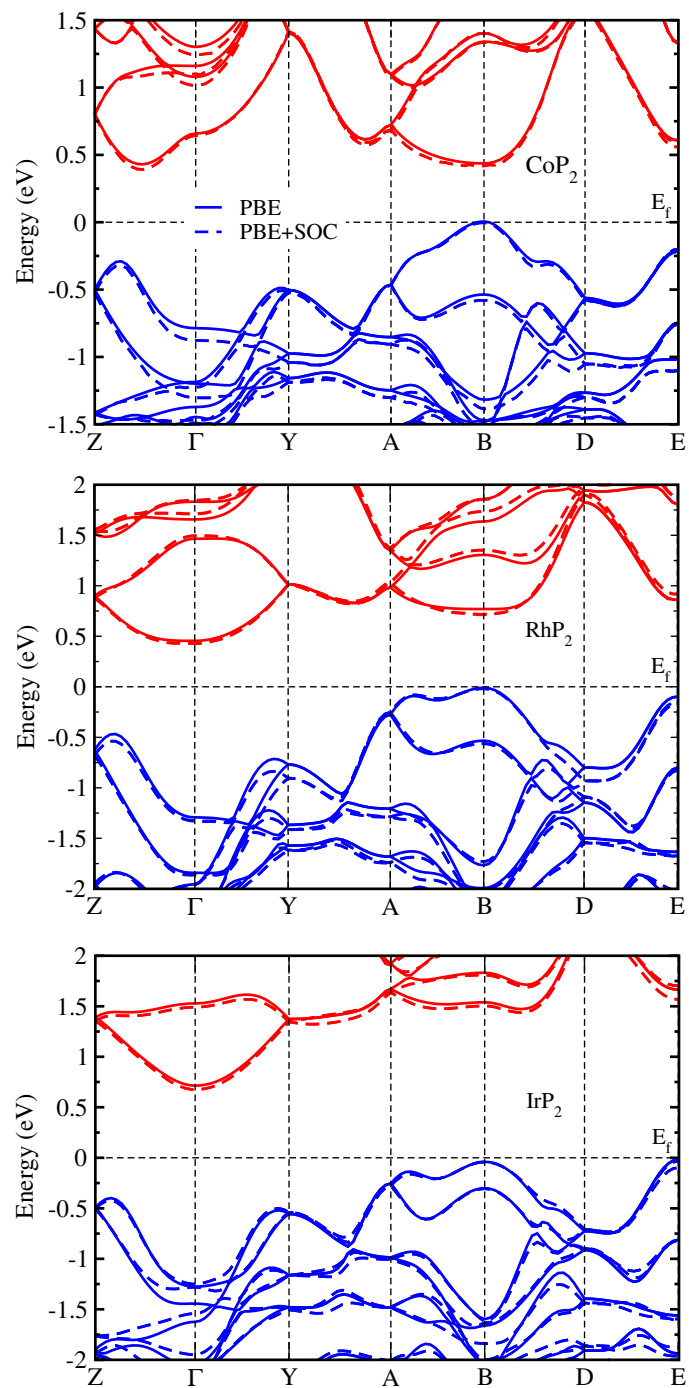

Figure S12. Electronic band structures calculated by using the PBE functional with (dotted) and without (solid) the spin-orbit coupling effect for  $\text{MP}_2$  ( $M = \text{Co}, \text{Rh}$  and  $\text{Ir}$ ).

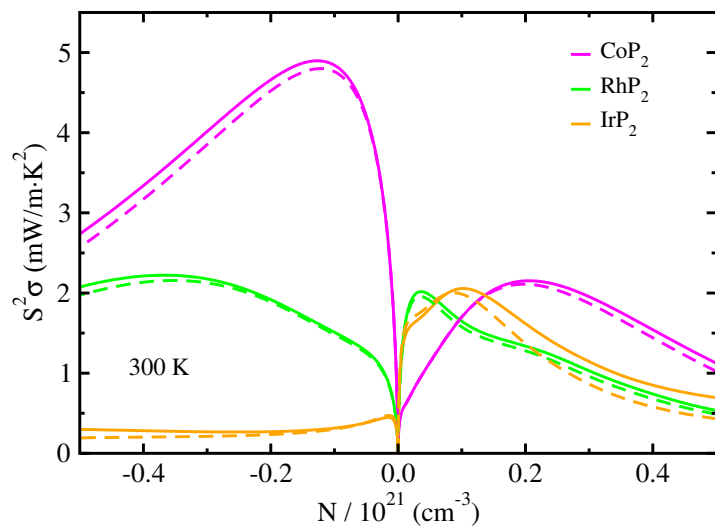

Figure S13. Thermopower factor  $S^2\sigma$  calculated at 300 K by using the PBE functional with (dotted) and without (solid) the spin-orbit coupling effect for  $\text{MP}_2$  ( $M = \text{Co}, \text{Rh}$  and  $\text{Ir}$ ).

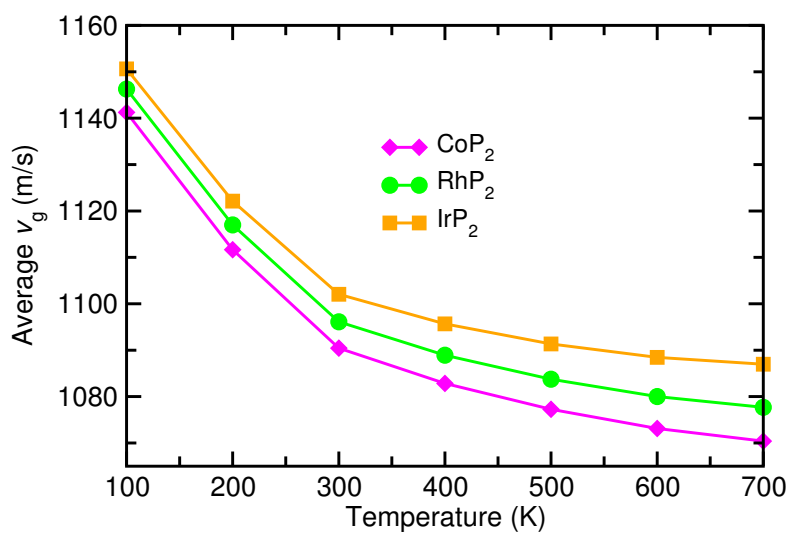

Figure S14. Average phonon group velocity as a function of temperature for  $\text{MP}_2$  ( $M = \text{Co}, \text{Rh}$  and  $\text{Ir}$ ).
